# Supplementary material for: Whole Genome Sequencing of Greater Amberjack (Seriola dumerili) for SNP Identification on Aligned Scaffolds and Genome Structural Variation Analysis Using Parallel Resequencing
Source: Int J Genomics. 2018 Mar 28;2018:7984292. doi: 10.1155/2018/7984292 (PMC5896239; doi:10.1155/2018/7984292)
Supplement: Supplementary 3 — Table S1: summary of the quality of the 20 amberjack resequenced genomes. The 20 greater amberjack genomes were resequenced in parallel, and an average of 18 Gbp was obtained for each genome. [file 7984292.f3.xlsx]

## Sheet: Sheet1
	Table S1. Summary of the quality of the 20 amberjack re-sequenced genomes
	Sample Name	Sample ID	Index	Project	Yield (Mbases)	# Reads	% of >= Q30 Bases	Mean Quality Score
	1(Kochi)	Ig4894	GCCAAT	50003899	17784	176078584	90.53	35.69
	2(Kochi)	Ig4895	CTTGTA	50003899	19188	189979886	90.62	35.72
	3(Kochi)	Ig4896	ACAGTG	50003899	18211	180309546	92.02	36
	4(Kochi)	Ig4897	GTGAAA	50003899	18003	178250218	91.99	35.99
	5(Kochi)	Ig4898	GCCAAT	50003899	17796	176202714	92.25	36.05
	6(Kochi)	Ig4899	CTTGTA	50003899	19199	190091698	92.35	36.07
	7(Kochi)	Ig4900	ACAGTG	50003899	18989	188008564	93.25	36.26
	8(Kochi)	Ig4901	GTGAAA	50003899	18781	185946104	93.05	36.22
	9(China)	Ig7999	TAGCTTAT	50005099	18520.4	183370152	91.5	38.1127
	10(China)	Ig8000	GGCTACAT	50005099	19800.8	196047330	90.7526	37.9045
	11(China)	Ig8001	CTTGTAAT	50005099	18024.7	178462812	91.6155	38.134
	12(China)	Ig8002	AGTCAACA	50005099	17989	178109242	91.4701	38.0945
	13(China)	Ig8003	AGTTCCGT	50005099	18702.7	185175410	91.6033	38.1282
	14(China)	Ig8004	ATGTCAGA	50005099	20287.2	200863278	91.3946	38.0603
	15(China)	Ig8005	CCGTCCCG	50005099	17729.5	175539156	90.0735	37.6916
	16(China)	Ig8006	GTCCGCAC	50005099	20606.9	204028668	91.4421	38.0795
	17(China)	Ig8007	GTGAAACG	50005099	17400.4	172281268	90.5278	37.8005
	18(China)	Ig8008	GTGGCCTT	50005099	19588.6	193946334	91.4741	38.0909
	19(China)	Ig8009	GTTTCGGA	50005099	19081	188920578	91.5991	38.1152
	20(China)	Ig8010	CGTACGTA	50005099	18772.7	185868558	91.0545	37.9799
