# Supplementary material for: Whole Genome Sequencing of Greater Amberjack (Seriola dumerili) for SNP Identification on Aligned Scaffolds and Genome Structural Variation Analysis Using Parallel Resequencing
Source: Int J Genomics. 2018 Mar 28;2018:7984292. doi: 10.1155/2018/7984292 (PMC5896239; doi:10.1155/2018/7984292)
Supplement: Supplementary 4 — Table S2: summary of the results of mapping the resequenced reads on the greater amberjack reference genome. Overall, 99% of the resequenced reads in all 20 genomes were successfully mapped onto the reference genome sequence. [file 7984292.f4.xlsx]

## Sheet: summary
	Table S2. Summary of the results of mapping the re-sequenced reads on the greater amberjack reference genome.
	Sample Name	Sample ID	# Processed reads	# Mapped reads	% of Mapped reads	# Duplicates reads	% of Duplicates reads	# Unmapped reads	% of Unmapped reads
	1(Kochi)	Ig4894	170496916	170305481	99.8877	3554380	2.08472	191435	0.112281
	2(Kochi)	Ig4895	183741450	183507859	99.8729	3877985	2.11057	233591	0.12713
	3(Kochi)	Ig4896	176078374	175874164	99.884	4167281	2.36672	204210	0.115977
	4(Kochi)	Ig4897	174040394	173859028	99.8958	3773461	2.16815	181366	0.104209
	5(Kochi)	Ig4898	171867606	171703275	99.9044	3891191	2.26406	164331	0.0956149
	6(Kochi)	Ig4899	185644292	185445457	99.8929	4163557	2.24276	198835	0.107105
	7(Kochi)	Ig4900	183734708	183539593	99.8938	3803221	2.06995	195115	0.106194
	8(Kochi)	Ig4901	181479456	181269551	99.8843	4251282	2.34257	209905	0.115663
	9(China)	Ig7999	170353418	169709996	99.6223	32937527	19.3348	643422	0.377698
	10(China)	Ig8000	180604134	179934031	99.629	32127413	17.7889	670103	0.371034
	11(China)	Ig8001	164855752	164302039	99.6641	27854029	16.896	553713	0.335877
	12(China)	Ig8002	164386730	163829912	99.6613	26144457	15.9042	556818	0.338724
	13(China)	Ig8003	169990956	169378000	99.6394	29039017	17.0827	612956	0.360582
	14(China)	Ig8004	185161502	184324677	99.5481	27965427	15.1033	836825	0.451943
	15(China)	Ig8005	159835586	159320689	99.6779	22434128	14.0358	514897	0.322142
	16(China)	Ig8006	188588638	188033926	99.7059	28717572	15.2276	554712	0.294139
	17(China)	Ig8007	159879726	159183049	99.5642	21427685	13.4024	696677	0.435751
	18(China)	Ig8008	180371684	179783100	99.6737	30624125	16.9783	588584	0.326317
	19(China)	Ig8009	176670890	175934044	99.5829	26068100	14.7552	736846	0.417073
	20(China)	Ig8010	171554662	170991489	99.6717	28182770	16.4279	563173	0.328276
