# Supplementary material for: Whole Genome Sequencing of Greater Amberjack (Seriola dumerili) for SNP Identification on Aligned Scaffolds and Genome Structural Variation Analysis Using Parallel Resequencing
Source: Int J Genomics. 2018 Mar 28;2018:7984292. doi: 10.1155/2018/7984292 (PMC5896239; doi:10.1155/2018/7984292)
Supplement: Supplementary 5 — Table S3: summary of sequence coverage information. The coverage information was obtained by filtering the resequencing data and mapping it onto the greater amberjack reference genome sequence. [file 7984292.f5.xlsx]

## Sheet: coverage
Field	Description	Ig4894	Ig4895	Ig4896	Ig4897	Ig4898	Ig4899	Ig4900	Ig4901	Ig7999	Ig8000	Ig8001	Ig8002	Ig8003	Ig8004	Ig8005	Ig8006	Ig8007	Ig8008	Ig8009	Ig8010
	TableS3. Summary of sequence coverage information
GENOME_TERRITORY	The number of non-N bases in the genome reference over which coverage will be evaluated.	672107804	672107804	672107804	672107804	672107804	672107804	672107804	672107804	672107804	672107804	672107804	672107804	672107804	672107804	672107804	672107804	672107804	672107804	672107804	672107804
MEAN_COVERAGE	The mean coverage in bases of the genome territory, after all filters are applied.	22.5917	24.3826	23.3858	23.176	22.9376	24.7748	24.6885	24.2715	18.8813	20.3549	18.8544	19.0734	19.4524	21.6221	18.8515	22.014	18.9908	20.5756	20.6477	19.5977
SD_COVERAGE	The standard deviation of coverage of the genome after all filters are applied.	20.0347	20.5992	20.6726	20.367	20.0101	21.3846	20.7359	20.9845	15.7743	16.9167	16.0199	15.7038	15.753	16.9386	15.9551	17.7974	15.9147	17.4757	17.3956	17.5882
MEDIAN_COVERAGE	The median coverage in bases of the genome territory, after all filters are applied.	23	25	24	24	23	25	25	25	19	21	19	19	20	22	19	22	19	21	21	20
MAD_COVERAGE	The median absolute deviation of coverage of the genome after all filters are applied.	5	5	5	5	5	5	5	5	4	4	4	4	4	5	4	5	5	4	4	4
PCT_EXC_MAPQ	The fraction of aligned bases that were filtered out because they were in reads with low mapping quality (default is < 20).	0.053398	0.052574	0.054904	0.054331	0.052698	0.053377	0.053065	0.053138	0.041034	0.042525	0.041319	0.038998	0.038947	0.041337	0.041588	0.041846	0.040493	0.042982	0.045652	0.047763
PCT_EXC_DUPE	The fraction of aligned bases that were filtered out because they were in reads marked as duplicates.	0.011634	0.01121	0.013479	0.011857	0.013422	0.012778	0.01099	0.013656	0.186789	0.170746	0.162428	0.153515	0.165198	0.144722	0.134296	0.145511	0.129019	0.162305	0.139864	0.155131
PCT_EXC_UNPAIRED	The fraction of aligned bases that were filtered out because they were in reads without a mapped mate pair.	0.000136	0.000143	0.000116	0.000122	0.000117	0.000111	0.000127	0.000121	0.000137	0.000136	0.000121	0.000124	0.000125	0.000133	0.000129	0.000124	0.00013	0.00012	0.000129	0.000124
PCT_EXC_BASEQ	The fraction of aligned bases that were filtered out because they were of low base quality (default is < 20).	0.034504	0.034067	0.029788	0.029984	0.028548	0.028413	0.024503	0.025074	0.015985	0.017832	0.016412	0.016954	0.016519	0.017295	0.020363	0.01722	0.019912	0.016831	0.016914	0.017476
PCT_EXC_OVERLAP	The fraction of aligned bases that were filtered out because they were the second observation from an insert with overlapping reads.	0.002768	0.002226	0.002508	0.002953	0.002969	0.002599	0.002794	0.002733	0.00194	0.002023	0.002183	0.001792	0.001758	0.001608	0.00165	0.001938	0.001974	0.002283	0.001965	0.002053
PCT_EXC_CAPPED	The fraction of aligned bases that were filtered out because they would have raised coverage above the capped value (default cap = 250x).	0.001678	0.00252	0.002598	0.001945	0.001611	0.002026	0.001714	0.002557	0.001634	0.001574	0.001595	0.00145	0.001117	0.001781	0.001947	0.002108	0.001993	0.001858	0.001857	0.002146
PCT_EXC_TOTAL	The total fraction of aligned bases excluded due to all filters.	0.104118	0.102739	0.103393	0.101191	0.099366	0.099305	0.093193	0.09728	0.247519	0.234836	0.224058	0.212832	0.223663	0.206875	0.199973	0.208748	0.193522	0.226379	0.20638	0.224692
PCT_5X	The fraction of bases that attained at least 5X sequence coverage in post-filtering bases.	0.945028	0.94623	0.944885	0.944761	0.944846	0.946617	0.947065	0.946718	0.945406	0.946104	0.94516	0.944773	0.945454	0.947096	0.944611	0.947231	0.943776	0.946761	0.947061	0.946652
PCT_10X	The fraction of bases that attained at least 10X sequence coverage in post-filtering bases.	0.920227	0.925764	0.9214	0.92058	0.920935	0.926606	0.928163	0.926911	0.913626	0.92182	0.908602	0.907536	0.911909	0.925805	0.906428	0.927765	0.897783	0.925126	0.92566	0.92152
PCT_15X	The fraction of bases that attained at least 15X sequence coverage in post-filtering bases.	0.858957	0.880519	0.866588	0.863539	0.863129	0.883045	0.885533	0.881657	0.776343	0.823085	0.763007	0.765199	0.781843	0.845988	0.760157	0.854992	0.745369	0.836497	0.837524	0.809649
PCT_20X	The fraction of bases that attained at least 20X sequence coverage in post-filtering bases.	0.69786	0.766137	0.726279	0.717557	0.711387	0.774204	0.775315	0.762959	0.473372	0.572211	0.468792	0.48328	0.508835	0.638718	0.469121	0.659292	0.47436	0.591145	0.59353	0.522998
PCT_25X	The fraction of bases that attained at least 25X sequence coverage in post-filtering bases.	0.414645	0.53106	0.466447	0.453071	0.43828	0.548769	0.544734	0.520001	0.178779	0.265173	0.187273	0.205322	0.223332	0.349088	0.1896	0.372307	0.212633	0.272251	0.276006	0.207877
PCT_30X	The fraction of bases that attained at least 30X sequence coverage in post-filtering bases.	0.158701	0.254014	0.201883	0.191927	0.177816	0.273804	0.266908	0.242086	0.042785	0.078871	0.049254	0.05858	0.065195	0.130048	0.05069	0.1439	0.066656	0.077538	0.080306	0.050828
PCT_40X	The fraction of bases that attained at least 40X sequence coverage in post-filtering bases.	0.010518	0.019599	0.01463	0.013849	0.012231	0.023496	0.021942	0.018322	0.004129	0.005718	0.004383	0.00475	0.005078	0.009331	0.004498	0.010317	0.00557	0.005459	0.005819	0.004687
PCT_50X	The fraction of bases that attained at least 50X sequence coverage in post-filtering bases.	0.00434	0.004553	0.00453	0.004594	0.00439	0.005153	0.005	0.004773	0.00251	0.002952	0.002512	0.002527	0.002665	0.003272	0.002584	0.003325	0.002709	0.002973	0.003139	0.002906
PCT_60X	The fraction of bases that attained at least 60X sequence coverage in post-filtering bases.	0.003233	0.003246	0.003346	0.003383	0.003217	0.003755	0.003605	0.003474	0.001833	0.002158	0.001832	0.001847	0.001967	0.002369	0.001909	0.002399	0.001995	0.002181	0.002305	0.002188
PCT_70X	The fraction of bases that attained at least 70X sequence coverage in post-filtering bases.	0.002556	0.002516	0.002642	0.00267	0.002518	0.002947	0.002815	0.002732	0.001417	0.001684	0.001424	0.001437	0.00153	0.001853	0.001487	0.001876	0.001567	0.001704	0.001804	0.001735
PCT_80X	The fraction of bases that attained at least 80X sequence coverage in post-filtering bases.	0.00211	0.002052	0.002168	0.002207	0.002045	0.002397	0.002306	0.002264	0.001134	0.00135	0.001159	0.001155	0.001231	0.001504	0.00119	0.001525	0.001283	0.001391	0.001468	0.001406
PCT_90X	The fraction of bases that attained at least 90X sequence coverage in post-filtering bases.	0.001775	0.001719	0.001817	0.001862	0.001709	0.00201	0.001931	0.001927	0.000942	0.00111	0.000976	0.000946	0.001011	0.001241	0.000969	0.001261	0.001067	0.001163	0.001229	0.001163
PCT_100X	The fraction of bases that attained at least 100X sequence coverage in post-filtering bases.	0.001514	0.001463	0.001558	0.001582	0.001462	0.001725	0.001648	0.00167	0.000807	0.000932	0.000836	0.000793	0.000854	0.001038	0.000807	0.001061	0.000901	0.000983	0.001053	0.000989
